# Supplementary material for: Peptide-Based Subunit Vaccine Design of T- and B-Cells Multi-Epitopes against Zika Virus Using Immunoinformatics Approaches
Source: PubMed Central journal article supplement (PMC6722788; doi:10.3390/microorganisms7080226), 2019-07-31
Supplement: microorganisms-07-00226-s001.pdf [file microorganisms-07-00226-s001.pdf]

**Table S1.** Zika polyprotein sequences used to obtain consensus sequence and in epitope conservancy analysis.

| GenBank accession <sup>1</sup> | Origin             | Year |
|--------------------------------|--------------------|------|
| ARB07967.1                     | Brazil             | 2016 |
| ARB07962.1                     | Brazil             | 2016 |
| AOY08541.2                     | Brazil             | 2016 |
| AOY08538.2                     | Brazil             | 2016 |
| AOY08518.2                     | Brazil             | 2016 |
| AOY08517.1                     | Brazil             | 2016 |
| ARB07981.1                     | Colombia           | 2016 |
| ARB07978.1                     | Colombia           | 2016 |
| ARB07988.1                     | Dominican Republic | 2016 |
| ARB07987.1                     | Dominican Republic | 2016 |
| ARB07953.1                     | Dominican Republic | 2016 |
| ARB07932.1                     | Dominican Republic | 2016 |
| ARB07927.1                     | Dominican Republic | 2016 |
| AOY08523.3                     | Dominican Republic | 2016 |
| AOY08539.3                     | Dominican Republic | 2016 |
| AOY08526.2                     | Dominican Republic | 2016 |
| AOY08542.1                     | Dominican Republic | 2016 |
| AOY08535.1                     | Dominican Republic | 2016 |
| AOY08525.1                     | Dominican Republic | 2016 |
| AOY08524.1                     | Dominican Republic | 2016 |
| AOY08521.1                     | Dominican Republic | 2016 |
| ARB07980.1                     | Florida            | 2016 |
| ARB07934.1                     | Florida            | 2016 |
| AOY08546.2                     | Florida            | 2016 |
| AOY08537.2                     | Florida            | 2016 |
| AOY08520.2                     | Florida            | 2016 |
| AOY08545.1                     | Florida            | 2016 |
| AOY08544.1                     | Florida            | 2016 |
| AOY08543.1                     | Florida            | 2016 |
| AOY08516.1                     | Florida            | 2016 |
| ARB07960.1                     | Honduras           | 2016 |
| ARB07954.1                     | Honduras           | 2016 |
| ARB07930.1                     | Honduras           | 2016 |
| AOY08540.2                     | Honduras           | 2016 |
| AOY08533.2                     | Honduras           | 2016 |
| AOY08531.2                     | Honduras           | 2016 |
| AOY08527.2                     | Honduras           | 2016 |
| AOY08536.1                     | Honduras           | 2016 |
| ARB07976.1                     | Puerto Rico        | 2016 |
| *AMD61711.1                    | Philippines        | 2012 |
| *APH11510.1                    | Singapore          | 2016 |
| *APH11493.1                    | Singapore          | 2016 |
| *AMR39834.1                    | Cambodia           | 2010 |
| *BAX00477.1                    | Vietnam            | 2016 |
| *AMK49492.2                    | Indonesia          | 2014 |
| *AMX81917.1                    | Thailand           | 2015 |
| *AMD61710.1                    | Thailand           | 2014 |
| *AMX81916.1                    | Thailand           | 2013 |
| *AHZ13508.1                    | French Polynesia   | 2013 |
| *ANO46301.1                    | French Polynesia   | 2013 |
| *ANO46303.1                    | French Polynesia   | 2014 |
| *AUI42194.1                    | Mexico             | 2016 |
| *AUD54964.1                    | Mexico             | 2016 |
| *ATG29267.1                    | Mexico             | 2016 |

<sup>1</sup> Sequences with \* are only used in conservancy analysis.

MKNPKKKS GGFRI V NMLKRGV ARVSPFGGLKRLPAGLLLGHGP I R MVLAILAFLRFTA I KPSLGLINRW  
GSV G K K E A M E I I K K F K D L A A M L R I I N A R K E K K R R G A D T S V G I V G L L L T T A M A A E V T R R G S A Y Y M Y L D  
R N D A G E A I S F P T T L G M N K C Y I Q I M D L G H M C D A T M S Y E C P M L D E G V E P D D V D C W C N T T S T W V V Y G T C  
H H K K G E A R R S R R A V T L P S H S T R K L Q T R S Q T W L E S R E Y T K H L I R V E N W I F R N P G F A L A A A A I A W L L G S S T  
S Q K V I Y L V M I L L I A P A Y S I R C I G V S N R D F V E G M S G G T W V D V V L E H G G C V T V M A Q D K P T V D I E L V T T T V S  
N M A E V R S Y C Y E A S I S D M A S D S R C P T Q G E A Y L D K Q S D T Q Y V C K R T L V D R G W G N G C G L F G K G S L V T C A K  
F A C S K K M T G K S I Q P E N L E Y R I M L S V H G S Q H S G M I V N D T G H E T D E N R A K V E I T P N S P R A E A T L G G F G S L G  
L D C E P R T G L D F S D L Y Y L T M N N K H W L V H K E W F H D I P L P W H A G A D T G T P H W N N K E A L V E F K D A H A K R  
Q T V V V L G S Q E G A V H T A L A G A L E A E M D G A K G R L S S G H L K C R L K M D K L R L K G V S Y S L C T A A F T F T K I P A E  
T L H G T V T V E V Q Y A G T D G P C K V P A Q M A V D M Q T L T P V G R L I T A N P V I T E S T E N S K M M L E L D P P F G D S Y I V I  
G V G E K K I T H H W H R S G S T I G K A F E A T V R G A K R M A V L G D T A W D F G S V G G A L N S L G K G I H Q I F G A A F K S L  
F G G M S W F S Q I L I G T L L M W L G L N T K N G S I S L M C L A L G G V L I F L S T A V S A D V G C S V D F S K K E T R C G T G V F V  
Y N D V E A W R D R Y K Y H P D S P R R L A A A V K Q A W E D G I C G I S S V S R M E N I M W R S V E G E L N A I L E E N G V Q L T V  
V V G S V K N P M W R G P Q R L P V P V N E L P H G W K A W G K S Y F V R A A K T N N S F V D G D T L K E C P L K H R A W N S F  
L V E D H G F G V F H T S V W L K V R E D Y S L E C D P A V I G T A V K G K E A V H S D L G Y W I E S E K N D T W R L K R A H L I E M  
K T C E W P K S H T L W T D G I E E S D L I P K S L A G P L S H H N T R E G Y R T Q M K G P W H S E E L I R F E E C P G T K V H V E E T  
C G T R G P S L R S T T A S G R V I E E W C C R E C T M P P L S F R A K D G C W Y G M E I R P R K E P E S N L V R S M V T A G S T D H M  
D H F S L G V L V I L L M V Q E G L K K R M T T K I I S T S M A V L V A M I L G G F S M S D L A K L A I L M G A T F A E M N T G G D V A  
H L A L I A A F K V R P A L L V S F I F R A N W T P R E S M L L A L A S C L L Q T A I S A L E G D L M V L I N G F A L A W L A I R A M V V  
P R T D N I T L A I L A A L T P L A R G T L L V A W R A G L A T C G G F M L L S L K G K G S V K K N L P F V M A L G L T A V R L V D P I  
N V V G L L L L T R S G K R S W P P S E V L T A V G L I C A L A G G F A K A D I E M A G P M A A V G L L I V S Y V S G K S V D M Y I E R  
A G D I T W E K D A E V T G N S P R L D V A L D E S G D F S L V E D D G P P M R E I I L K V V L M T I C G M N P I A I P F A A G A W Y V Y  
V K T G K R S G A L W D V P A P K E V K K G E T T D G V Y R V M T R R L L G S T Q V G V G V M Q E G V F H T M W H V T K G S A L R  
S G E G R L D P Y W G D V K Q D L V S Y C G P W K L D A A W D G H S E V Q L L A V P P G E R A R N I Q T L P G I F K T K D G D I G A V  
A L D Y P A G T S G S P I L D K C G R V I G L Y G N G V I K N G S Y V S A I T Q G R R E E T P V E C F E P S M L K K K Q L T V L D L H P  
G A G K T R R V L P E I V R E A I K T R L R T V I L A P T R V V A A E M E E A L R G L P V R Y M T T A V N V T H S G T E I V D L M C H A T  
F T S R L L Q P I R V P N Y N L Y I M D E A H F T D P S S I A A R G Y I S T R V E M G E A A A I F M T A T P P G T R D A F P D S N S P I M D T  
E V E V P E R A W S S G F D W T D H S G K T V W F V P S V R N G N E I A A C L T K A G K R V I Q L S R K T F E T E F Q K T K H Q E W  
D F V V T T D I S E M G A N F K A D R V I D S R R C L K P V I L D G E R V I L A G P M P V T H A S A A Q R R G R I G R N P N K P G D E Y L  
Y G G G C A E T D E D H A H W L E A R M L L D N I Y L Q D G L I A S L Y R P E A D K V A A I E G E F K L R T E Q R K T F V E L M K R G  
D L P V W L A Y Q V A S A G I T Y T D R R W C F D G T T N T I M E D S V P A E V W T R H G E K R V L K P R W M D A R V C S D H A  
A L K S F K E F A A G K R G A A F G V M E A L G T L P G H M T E R F Q E A I D N L A V L M R A E T G S R P Y K A A A A Q L P E T L E T I  
M L L G L L G T V S L G I F F V L M R N K G I G K M G F G M V T L G A S A W L M W L S E I E P A R I A C V L I V V F L L L V V L I P E P E K  
Q R S P Q D N Q M A I I I M V A V G L L G L I T A N E L G W L E R T K S D L S H L M G R R E E G A T I G F S M D I D L R P A S A W A I Y A  
A L T T F I T P A V Q H A V T T S Y N N Y S L M A M A T Q A G V L F G M G K G M P F Y A W D F G V P L L M I G C Y S Q L T P L T L I V  
A I I L L V A H Y M Y L I P G L Q A A A A R A A Q K R T A A G I M K N P V D G I V V T D I D T M T I D P Q V E K K M G Q V L L I A V A  
V S S A I L S R T A W G W G E A G A L I T A A T S T L W E G S P N K Y W N S S T A T S L C N I F R G S Y L A G A S L I Y T V T R N A G L V  
K R R G G G T G E T L G E K W K A R L N Q M S A L E F Y S Y K K S G I T E V C R E E A R R A L K D G V A T G G H A V S R G S A K L R W  
L V E R G Y L Q P Y G K V I D L G C G R G G W S Y A A T I R K V Q E V K G Y T K G G P G H E E P V L V Q S Y G W N I V R L K S G V D  
V F H M A A E P C D T L L C D I G E S S S P E V E E A R T L R V L S M V G D W L E K R P G A F C I K V L C P Y T S T M M E T L E R L Q R  
R Y G G G L V R V P L S R N S T H E M Y W V S G A K S N T I K S V S T S Q L L G R M D G P R R P V K Y E E D V N L G S G T R A V V S  
C A E A P N M K I I G N R I E R I R S E H A E T W F F D E N H P Y R T W A Y H G S Y E A P T Q G S A S S L I N G V V R L L S K P W D V V T  
G V T G I A M T D T P Y G Q Q R V F K E K V D T R V P D P Q E G T R Q V M S M V S S W L W K E L G K H K R P R V C T K E E F I N K V  
R S N A A L G A I F E E E K E W K T A V E A V N D P R F W A L V D K E R E H H L R G E C Q S C V Y N M M G K R E K K Q G E F G K A K  
G S R A I W Y M W L G A R F L E F E A L G F L N E D H W M G R E N S G G G V E G L G L Q R L G Y V L E E M S R I P G G R M Y A D D T  
A G W D T R I S R F D L E N E A L I T N Q M E K G H R A L A L A I I K Y T Y Q N K V V K V L R P A E K G K T V M D I S R Q D Q R G S G  
Q V V T Y A L N T F T N L V V Q L I R N M E A E E V L E M Q D L W L L R R S E K V T N W L Q S N G W D R L K R M A V S G D D C V V  
K P I D D R F A H A L R F L N D M G K V R K D T Q E W K P S T G W D N W E E V P F C S H H F N K L H L K D G R S I V V P C R H Q D E  
L I G R A R V S P G A G W S I R E T A C L A K S Y A Q M W Q L L Y F H R R D L R L M A N A I C S S V P V D W V P T G R T T W S I H G K  
G E W M T T E D M L V V W N R V W I E E N D H M E D K T P V T K W T D I P Y L G K R E D L W C G S L I G H R P R T T W A E N I K N T  
V N M V R R I I G D E E K Y M D Y L S T Q V R Y L G E E G S T P G V L .

**Diagram S1.** Consensus Zika polyprotein sequence

**Table S2.** Validation of homology modeled MHC structures and their template structures.

| Molecule            | Structure        | Errat <sup>1</sup> |         | ProQ <sup>2</sup> |        | Verify3D <sup>3</sup>     |                  |                     | MolProbity <sup>4</sup>  |                         |                            |              |               |
|---------------------|------------------|--------------------|---------|-------------------|--------|---------------------------|------------------|---------------------|--------------------------|-------------------------|----------------------------|--------------|---------------|
|                     |                  | QF<br>A            | QF<br>B | LGscore           | MaxSub | 3D/1D<br>profile<br>≥ 0.2 | Poor<br>rotamers | Favored<br>rotamers | Ramachandran<br>outliers | Ramachandran<br>favored | Cβ<br>deviations<br>>0.25Å | Bad<br>bonds | Bad<br>angles |
| DQA1*0501/DQB1*0303 | Template<br>1UVQ | 93.49              | 92.12   | 4.774             | 0.361  | 78.07%                    | 0.00%            | 99.11%              | 0.27%                    | 97.33%                  | 0.00%                      | 0.00%        | 0.02%         |
|                     | Model            | 83.62              | 79.55   | 4.059             | 0.291  | 70.00%                    | 2.06%            | 96.18%              | 0.82%                    | 96.99%                  | 1.13%                      | 0.06%        | 1.30%         |
| DQA1*0201/DQB1*0303 | Template<br>1UVQ | 93.49              | 92.12   | 4.774             | 0.361  | 78.07%                    | 0.00%            | 99.11%              | 0.27%                    | 97.33%                  | 0.00%                      | 0.00%        | 0.02%         |
|                     | Model            | 72.09              | 79.01   | 4.118             | 0.304  | 74.93%                    | 1.75%            | 93.57%              | 1.09%                    | 96.46%                  | 0.84%                      | 0.06%        | 1.38%         |
| DRB1*1101           | Template<br>4MD5 | 78.95              | 96.05   | 3.975             | 0.331  | 78.53%                    | 1.08%            | 95.95%              | 0.00%                    | 98.40%                  | 0.00%                      | 0.09%        | 0.02%         |
|                     | Model            | 59.88              | 89.01   | 3.749             | 0.302  | 79.46%                    | 0.89%            | 96.75%              | 0.00%                    | 98.09%                  | 0.28%                      | 0.00%        | 1.16%         |
| DRB1*0901           | Template<br>5V4M | 78.24              | 90.81   | 4.68              | 0.371  | 85.45%                    | 0.87%            | 93.62%              | 0.27%                    | 98.66%                  | 0.00%                      | 0.03%        | 0.02%         |
|                     | Model            | 58.82              | 77.90   | 4.168             | 0.315  | 82.02%                    | 0.60%            | 95.20%              | 0.00%                    | 98.07%                  | 0.29%                      | 0.00%        | 1.28%         |

<sup>1</sup> QF: Quality Factor, for chains A and B [97].

<sup>2</sup> LGscore: >1.5 = fairly good; >2.5 = very good; > 4 = extremely good [98]. MaxSub: >0.1 = fairly good; >0.5 = very good; >0.8 = extremely good [98]

<sup>3</sup> Verify3D target for 3D/1D profile ≥ 0.2 is >80% [99].

<sup>4</sup> MolProbity targets for: Poor rotamer: <0.3%; Favored rotamer: >98%; Ramachandran outliers: <0.05%; Ramachandran favored: >98%; Cβ deviations >0.25Å: 0; Bad bonds: 0%; Bad angles: <0.1% [100].

**Table S3.** List of hydrogen bonds for docked MHC-I epitopes.

| <b>MVLAILAFL</b> |            |              | <b>YMWLGARFL</b> |            |              |
|------------------|------------|--------------|------------------|------------|--------------|
| Ligand           | Receptor   | Distance (Å) | Ligand           | Receptor   | Distance (Å) |
| Met1:N           | Tyr171:OH  | 2.71         | Tyr1:N           | Tyr171:OH  | 2.77         |
| Met1:N           | Tyr7:OH    | 2.87         | Tyr1:N           | Tyr7:OH    | 2.99         |
| Met1:O           | Tyr159:OH  | 2.7          | Tyr1:O           | Tyr159:OH  | 3.27         |
| Val2:N           | Glu63:OE1  | 2.99         | Met2:N           | Glu63:OE2  | 3.03         |
| Val2:O           | Lys66:NZ   | 3.07         | Leu4:O           | Arg97:NH2  | 2.79         |
| Leu3:N           | Tyr99:OH   | 2.92         | Arg7:NH1         | Tyr116:OH  | 3.13         |
| Ala7:O           | Tyr116:OH  | 2.74         | Arg7:NH2         | Tyr116:OH  | 2.78         |
| Phe8:O           | Trp147:NE1 | 2.91         | Arg7:O           | Trp147:NE1 | 3.01         |
| Leu9:N           | Asp77:OD1  | 3.1          |                  |            |              |
| <b>YAWDFGVPL</b> |            |              | <b>RYMTTAVNV</b> |            |              |
| Ligand           | Receptor   | Distance (Å) | Ligand           | Receptor   | Distance (Å) |
| Tyr1:N           | Tyr171:OH  | 2.8          | Arg1:NH2         | Glu63:OE2  | 3.33         |
| Tyr1:O           | Tyr159:OH  | 2.68         | Arg1:NE          | Glu63:OE2  | 2.8          |
| Tyr1:N           | Tyr7:OH    | 3.05         | Arg1:N           | Tyr171:OH  | 3.07         |
| Ala2:O           | Lys66:NZ   | 3.22         | Arg1:N           | Tyr7:OH    | 2.86         |
| Trp3:N           | Tyr99:OH   | 3.09         | Arg1:O           | Tyr159:OH  | 2.69         |
| Pro8:O           | Trp147:NE1 | 2.8          | Asn8:ND2         | Thr80:OG1  | 3.15         |
| Leu9:N           | Asp77:OD1  | 2.97         | Asn8:O           | Trp147:NE1 | 2.85         |
|                  |            |              | Asn8:ND2         | Asp77:OD1  | 2.86         |
|                  |            |              | Val9:N           | Asp77:OD1  | 2.8          |
| <b>WYMWLGARF</b> |            |              | <b>AIYAALTTF</b> |            |              |
| Ligand           | Receptor   | Distance (Å) | Ligand           | Receptor   | Distance (Å) |
| Tyr2:OH          | His70:ND1  | 3.04         | Ala1:N           | Tyr171:OH  | 3.28         |
| Trp4:NE1         | Tyr99:OH   | 3.05         | Ala1:N           | Tyr59:OH   | 3.19         |
| Arg8:NE          | Thr73:OG1  | 3.11         | Ala1:N           | Tyr7:OH    | 3.12         |
| Arg8:NH2         | Thr73:OG1  | 3            | Ala1:O           | Tyr159:OH  | 2.55         |
| Arg8:NH1         | Gln72:OE1  | 3.1          | Ile2:N           | Glu63:OE1  | 2.94         |
| Arg8:NH2         | Gln72:OE1  | 3.12         | Ile2:O           | Arg62:NH1  | 3.03         |
| Arg8:O           | Phe9:NZ    | 2.92         | Ile2:O           | Arg62:NH2  | 2.99         |
|                  |            |              | Tyr3:N           | Tyr99:OH   | 2.79         |
|                  |            |              | Thr7:OG1         | Asn70:OD1  | 2.77         |
|                  |            |              | Thr7:OG1         | Thr73:OG1  | 2.98         |
|                  |            |              | Thr8:O           | Trp147:NE1 | 2.9          |
|                  |            |              | Phe9:N           | Ser77:OG   | 3.1          |
| <b>FAAGAWYVY</b> |            |              | <b>IAMTDTTPY</b> |            |              |
| Ligand           | Receptor   | Distance (Å) | Ligand           | Receptor   | Distance (Å) |
| Phe1:N           | Asn63:OD1  | 3.27         | Ile1:N           | Tyr59:OH   | 2.82         |
| Phe1:N           | Tyr59:OH   | 2.85         | Ile1:N           | Asn63:OD1  | 3.16         |
| Phe1:N           | Tyr171:OH  | 3.3          | Ile1:N           | Tyr7:OH    | 2.81         |
| Phe1:N           | Tyr7:OH    | 2.8          | Ala2:N           | Tyr7:OH    | 3.13         |
| Ala2:O           | Tyr159:OH  | 3.06         | Ala2:O           | Tyr159:OH  | 2.85         |
| Tyr7:O           | Trp147:NE1 | 3.06         | Pro8:O           | Trp147:NE1 | 3.08         |
| Val8:O           | Trp147:NE1 | 3.17         | Tyr9:N           | Ser77:OG   | 3.02         |
| Tyr9:N           | Ser77:OG   | 3.02         | Tyr9:OH          | Ser116:OG  | 2.8          |
| Tyr9:OH          | Ser116:OG  | 2.81         |                  |            |              |
| <b>WFHDIPLPW</b> |            |              |                  |            |              |
| Ligand           | Receptor   | Distance (Å) |                  |            |              |
| Trp1:N           | Tyr7:OH    | 2.91         |                  |            |              |

|          |            |      |
|----------|------------|------|
| Trp1:N   | Tyr171:OH  | 2.95 |
| Trp1:O   | Tyr159:OH  | 2.65 |
| Phe2:N   | Glu63:OE2  | 2.87 |
| Asp4:OD2 | Gln70:NE2  | 3.16 |
| Ile5:O   | Arg156:NH2 | 3.33 |
| Leu7:N   | Gln70:OE1  | 3.06 |
| Pro8:O   | Trp147:NE1 | 2.8  |

**Table S4.** List of hydrogen bonds for docked MHC-II epitopes.

| <b>I A V A V S S A I</b> |             |              | <b>I E M A G P M A A</b> |             |              |
|--------------------------|-------------|--------------|--------------------------|-------------|--------------|
| Ligand                   | Receptor    | Distance (Å) | Ligand                   | Receptor    | Distance (Å) |
| Ala2:N                   | A:Tyr11:OH  | 2.89         | Ile1:N                   | B:Asp57:OD1 | 2.81         |
| Ser6:OG                  | A:Thr63:OG  | 2.92         | Glu2:OE2                 | A:Asn71:ND2 | 3.16         |
| Ser7:O                   | B:Arg70:NH1 | 3.08         | Glu2:OE1                 | B:Arg70:NH2 | 3.08         |
| Ser7:O                   | B:Arg70:NH2 | 3.05         | Glu2:O                   | B:Trp61:NE1 | 3.24         |
| <b>S L M A M A T Q A</b> |             |              | <b>Y R I M L S V H G</b> |             |              |
| Ligand                   | Receptor    | Distance (Å) | Ligand                   | Receptor    | Distance (Å) |
| Ser1:OG                  | A:Leu54:OG  | 3.02         | Tyr1:N                   | A:Ser53:O   | 3.2          |
| Ser1:N                   | A:Arg55:O   | 3.08         | Arg2:N                   | B:Asn82:OD1 | 2.93         |
| Ala4:O                   | B:Thr77:OG1 | 2.84         | Arg2:O                   | B:Asn82:ND2 | 3.16         |
| Met5:O                   | B:Arg70:NH2 | 2.77         | Met4:N                   | A:Gln9:OE1  | 3            |
| Ala6:N                   | B:Glu74:OE2 | 2.78         | Met4:O                   | A:Gln9:NE2  | 3.14         |
| Gln8:NE2                 | B:Tyr47:OH  | 2.99         | Val7:N                   | B:Tyr30:OH  | 2.91         |
|                          |             |              | Val7:O                   | A:Asn69:ND2 | 3.29         |
|                          |             |              | His8:O                   | B:Trp61:NE1 | 3.11         |
|                          |             |              | Gly9:N                   | A:Asn69:OD1 | 2.99         |
| <b>L Y F H R R D L R</b> |             |              | <b>I I L L V A H Y M</b> |             |              |
| Ligand                   | Receptor    | Distance (Å) | Ligand                   | Receptor    | Distance (Å) |
| Tyr2:OH                  | A:Ser53:OH  | 2.87         | Ile1:N                   | A:Ser53:O   | 3.11         |
| His4:ND1                 | A:Asn62:OD1 | 3.01         | Leu4:O                   | A:Gln9:NE2  | 2.82         |
| Arg5:O                   | A:Asn62:ND2 | 3.1          | Leu4:O                   | A:Asn62:ND2 | 3.2          |
| Arg6:NH                  | A:Glu11:OE2 | 2.94         | Val5:O                   | B:Gln70:NE2 | 2.78         |
| Arg6:NH2                 | A:Glu11:OE2 | 2.92         | Ala6:O                   | B:Tyr30:OH  | 2.84         |
| Arg6:NH2                 | B:Ser13:OG  | 2.98         | His7:NE2                 | A:Asp66:OD1 | 3.32         |
| Arg6:O                   | B:Arg74:NH2 | 3.19         |                          |             |              |
| Asp7:O                   | A:Asn69:ND2 | 3.11         |                          |             |              |
| Leu8:O                   | B:Trp61:NE1 | 2.93         |                          |             |              |
| Arg9:N                   | A:Asn69:OD1 | 3.04         |                          |             |              |
| Arg9:NH1                 | B:Asp57:OD2 | 2.84         |                          |             |              |
| Arg9:NH2                 | B:Glu9:OE2  | 2.74         |                          |             |              |
| <b>F K K D L A A M L</b> |             |              | <b>W A I Y A A L T T</b> |             |              |
| Ligand                   | Receptor    | Distance (Å) | Ligand                   | Receptor    | Distance (Å) |
| Lys3:NZ                  | A:Glu55:O   | 3.21         | Trp1:N                   | A:Ser53:O   | 2.8          |
| Lys2:NZ                  | A:Glu55:OE1 | 3.22         | Ala2:N                   | B:Asn82:OD1 | 3.01         |
| Asp4:O                   | A:Gln9:NE2  | 3.17         | Ala2:O                   | B:Asn82:ND2 | 2.92         |
| Asp4:O                   | A:Asn62:ND2 | 2.85         | Tyr4:N                   | A:Gln9:OE1  | 3.09         |
| Leu5:O                   | B:His28:NE2 | 3.03         | Ala5:O                   | A:Asn62:ND2 | 3            |
|                          |             |              | Leu7:O                   | A:Asn69:ND2 | 2.87         |
|                          |             |              | Thr9:N                   | A:Asn69:OD1 | 2.88         |

**Table S5.** List of consensus linear B cell epitopes, scores averaged across all residues, and their filtration results.

| Prot | Pos | Len        | Peptide                 | BepiPre<br>d mean | LBtope<br>mean | Toxic <sup>1</sup> | Conser<br>vancy <sup>1</sup> | Anti<br>genic <sup>1</sup> | Auto-<br>imm<br>une <sup>1</sup> |
|------|-----|------------|-------------------------|-------------------|----------------|--------------------|------------------------------|----------------------------|----------------------------------|
| C    | 24  | 6          | VSPFGG                  | 54.69             | 66.02          | O                  | O                            | O                          | X                                |
|      | 68  | 10         | RWGSVGGKKEA             | 55.70             | 62.75          | O                  | O                            | X                          | O                                |
| prM  | 56  | 10         | LDEGVPEPDDV             | 55.92             | 68.85          | O                  | O                            | O                          | O                                |
|      | 84  | 20         | KKGEARRSRAVTLPSHSTR     | 56.74             | 79.96          | O                  | O                            | O                          | O                                |
| M    | 25  | 7          | YTKHLIR                 | 52.44             | 67.70          | O                  | O                            | O                          | O                                |
| E    | 89  | 15         | QYVCKRTLVDGRWGN         | 55.04             | 79.01          | O                  | O                            | O                          | O                                |
|      | 126 | 9          | TGKSIQPEN               | 51.17             | 81.88          | O                  | O                            | X                          | O                                |
|      | 146 | 8          | SQHSGMIV                | 61.67             | 67.73          | O                  | O                            | O                          | O                                |
|      | 216 | 7          | EWFHDIIP                | 53.29             | 65.21          | O                  | O                            | O                          | O                                |
|      | 396 | 12         | ITHHWHRSGSTI            | 51.95             | 67.45          | O                  | O                            | X                          | O                                |
|      | 428 | 9          | AWDFGSVGG               | 56.27             | 63.03          | O                  | O                            | O                          | O                                |
| NS1  | 28  | 13         | WRDRYKYHPDSPR           | 55.71             | 84.05          | O                  | O                            | O                          | O                                |
|      | 94  | 8          | KNPMWRGP                | 59.70             | 64.42          | O                  | X                            | X                          | O                                |
|      | 141 | 8          | KECPLKHR                | 54.71             | 64.05          | O                  | O                            | O                          | O                                |
|      | 253 | 12         | HHNTREGYRTQM            | 63.38             | 69.13          | O                  | X                            | O                          | O                                |
|      | 293 | 11         | TRGPSLRSTTA             | 56.56             | 64.73          | O                  | O                            | X                          | O                                |
|      | 338 | 11         | RKEPESNLVRS             | 54.47             | 74.24          | O                  | O                            | O                          | O                                |
| NS3  | 6   | 7          | DVPAPKE                 | 52.23             | 67.54          | O                  | O                            | O                          | O                                |
|      | 27  | 7          | TRRLGS                  | 54.38             | 73.89          | O                  | O                            | O                          | O                                |
|      | 58  | 6          | LRSGEG                  | 50.84             | 66.41          | O                  | O                            | X                          | X                                |
|      | 65  | 11         | LDPYWGDVKQD             | 53.12             | 69.23          | O                  | O                            | O                          | O                                |
|      | 82  | 9          | PWKLDAAWD               | 54.20             | 74.98          | O                  | O                            | O                          | O                                |
|      | 110 | 6          | QTLPGI                  | 51.56             | 69.35          | O                  | X                            | O                          | X                                |
|      | 328 | 21         | DSNSPIMDTEVEVPERAWSSG   | 59.59             | 68.99          | O                  | X                            | X                          | O                                |
|      | 479 | 9          | ETDEDHAHW               | 55.06             | 69.22          | O                  | O                            | X                          | O                                |
|      | 557 | 24         | TDRRWCFDGTNTTIMEDSVPAEV | 56.55             | 68.56          | O                  | X                            | O                          | O                                |
| 594  | 11  | WMDARVCSHA | 54.89                   | 68.68             | O              | O                  | O                            | O                          |                                  |
| NS4B | 207 | 7          | WEGSPNK                 | 52.24             | 67.88          | O                  | O                            | X                          | O                                |
| NS5  | 34  | 15         | EVCREEARRALKDGV         | 52.57             | 76.82          | O                  | O                            | O                          | O                                |
|      | 153 | 9          | SPEVEEART               | 57.22             | 81.69          | O                  | O                            | O                          | O                                |
|      | 196 | 7          | ERLQRRY                 | 52.51             | 71.37          | O                  | X                            | X                          | O                                |
|      | 247 | 17         | PRRPVKYEEDVNLGSGT       | 55.39             | 76.29          | O                  | O                            | O                          | O                                |
|      | 295 | 7          | FDENHPY                 | 53.20             | 70.58          | O                  | X                            | X                          | O                                |
|      | 353 | 9          | QRVFKEKVD               | 56.86             | 63.41          | O                  | O                            | O                          | O                                |
|      | 363 | 7          | RVPDPQE                 | 60.04             | 64.55          | O                  | O                            | O                          | O                                |
|      | 414 | 24         | FEEKEWKTAVEAVNDPRFWALVD | 51.84             | 71.12          | O                  | O                            | O                          | O                                |
|      | 466 | 6          | FGKAKG                  | 57.25             | 68.95          | X                  | O                            | X                          | X                                |
|      | 598 | 9          | QDQRGSGQV               | 58.31             | 76.80          | O                  | O                            | O                          | O                                |
|      | 696 | 10         | WKPSTGWDNW              | 59.32             | 68.56          | O                  | X                            | X                          | O                                |
|      | 822 | 9          | ENDHMEDKT               | 57.09             | 70.84          | O                  | O                            | X                          | O                                |
|      | 840 | 16         | YLGKREDLWCGSLIGH        | 55.43             | 64.29          | O                  | X                            | O                          | O                                |
|      | 857 | 7          | PRTTWAE                 | 54.88             | 71.57          | O                  | O                            | X                          | O                                |

<sup>1</sup> X = eliminated (toxic/nonconserved/nonantigenic/autoimmune risk), O = not eliminated.

**Table S6.** Validation of homology modeled MHC structures and their template structures.

| Molecule | Structure     | Errat <sup>1</sup> | ProQ <sup>2</sup> |         | Verify3D <sup>3</sup> | MolProbity <sup>4</sup> |                        |                  |                     |                              |                             |                         |
|----------|---------------|--------------------|-------------------|---------|-----------------------|-------------------------|------------------------|------------------|---------------------|------------------------------|-----------------------------|-------------------------|
|          |               |                    | QF                | LGscore |                       | MaxSub                  | 3D/1D profile<br>≥ 0.2 | Poor<br>rotamers | Favored<br>rotamers | Ramachan<br>dran<br>outliers | Ramachan<br>dran<br>favored | Cβ deviations<br>>0.25Å |
| prM      | Template 4B03 | NA                 | 9.558             | 1.099   | NA                    | NA                      | NA                     | NA               | NA                  | NA                           | NA                          | NA                      |
|          | Model         | 16.89              | 1.811             | 0.212   | 39.29%                | 2.78%                   | 90.28%                 | 3.61%            | 88.55%              | 0.00%                        | 0.00%                       | 1.24%                   |
| NS3      | Template 5YOF | 98.56              | 4.611             | 0.363   | 89.74%                | 0.85%                   | 95.73%                 | 0.00%            | 97.40%              | 0.00%                        | 0.00%                       | 0.00%                   |
| Protease | Model         | 86.39              | 4.945             | 0.387   | 89.74%                | 0.81%                   | 97.56%                 | 0.00%            | 100.00%             | 0.00%                        | 0.00%                       | 0.61%                   |
| NS3      | Template 5VI7 | 95.62              | 6.396             | 0.292   | 92.87%                | 0.54%                   | 95.92%                 | 0.23%            | 97.22%              | 0.00%                        | 0.00%                       | 0.00%                   |
| Helicase | Model         | 82.22              | 6.037             | 0.53    | 86.85%                | 1.34%                   | 95.43%                 | 0.91%            | 97.04%              | 0.48%                        | 0.03%                       | 1.14%                   |
| NS5      | Template 5U0B | 94.59              | 5.608             | 0.455   | 91.85%                | 5.84%                   | 85.13%                 | 0.34%            | 94.67%              | 0.00%                        | 0.00%                       | 0.00%                   |
|          | Model         | 83.2               | 5.56              | 0.45    | 90.83%                | 2.25%                   | 94.30%                 | 0.00%            | 97.62%              | 0.37%                        | 0.00%                       | 1.15%                   |

<sup>1</sup> QF: Quality Factor, for chains A and B [97].

<sup>2</sup> LGscore: >1.5 = fairly good; >2.5 = very good; > 4 = extremely good [98]. MaxSub: >0.1 = fairly good; >0.5 = very good; >0.8 = extremely good [98]

<sup>3</sup> Verify3D target for 3D/1D profile ≥ 0.2 is >80% [99].

<sup>4</sup> MolProbity targets for: Poor rotamer: <0.3%; Favored rotamer: >98%; Ramachandran outliers: <0.05%; Ramachandran favored: >98%; Cβ deviations >0.25Å: 0; Bad bonds: 0%; Bad angles: <0.1% [100].
